# Supplementary material for: Longitudinal Links Between Media Use and Focused Attention Through Toddlerhood: A Cumulative Risk Approach
Source: PubMed Central journal article supplement (PMC7667257; doi:10.3389/fpsyg.2020.569222), 2020-11-02
Supplement: Image_2.pdf [file Image_2.pdf]

### Supplementary Figure 2.

An ARCL model estimating autoregressive and cross-lagged paths between repeated measures of CMU, MREG and FA between T1 to T3.

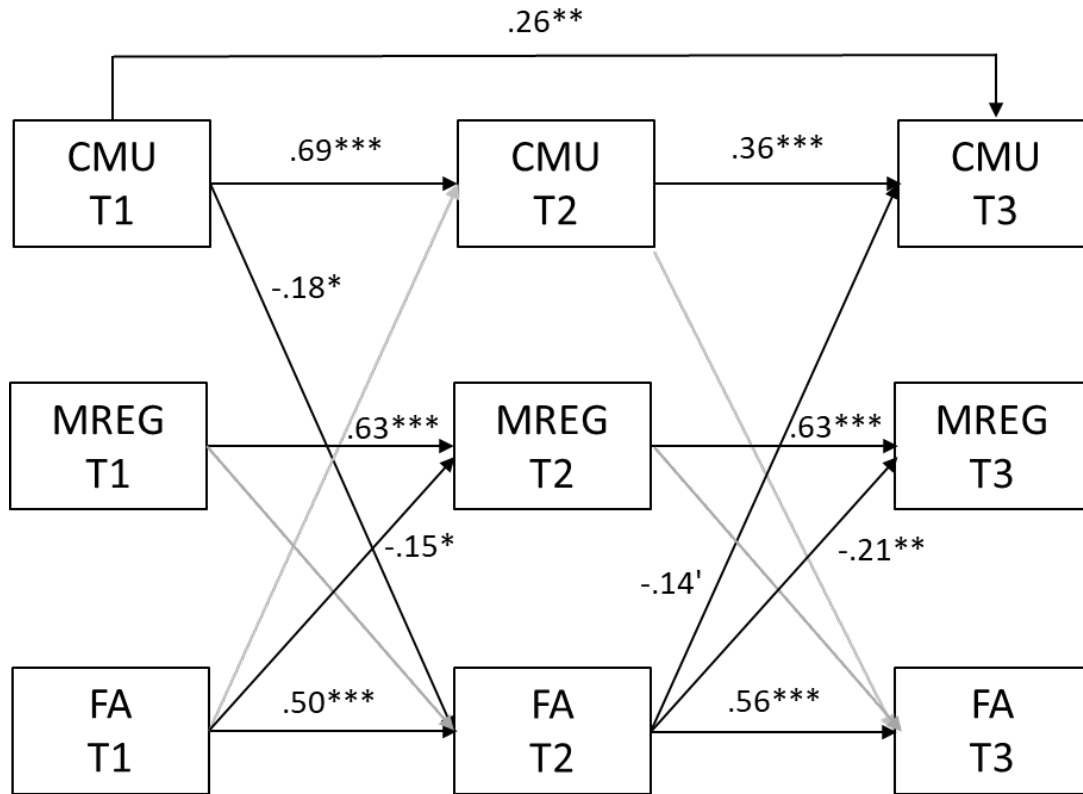

*Note.* For ease of presentation only significant paths are included in the figure, and all concurrent associations within time points were estimated but are not presented; The following covariates were included in the model, but are not depicted in this figure: maternal education, child sex, supportive and unsupportive parenting behaviors; CMU = cumulative media use, MREG = use of media to regulate child distress, FA = focused attention; ' $<0.1$ ,  $p^{**} < 0.01$ ,  $p^{***} < 0.001$ .
